# Supplementary material for: Relationship between self-reported listening and communication difficulties and executive function: a protocol for a systematic review and meta-analysis
Source: HighWire-hosted journal article supplement (doi:10.1136/bmjopen-2022-071225), 2023-11-01
Supplement: bmjopen-2022-071225supp001_data_supplement.pdf [file bmjopen-2022-071225supp001_data_supplement.pdf]

| <b>Search strategies</b>                                                                                                                                                                                                                                                                                                                                                                                                                                                                                                                                                                                                                                                                            |
|-----------------------------------------------------------------------------------------------------------------------------------------------------------------------------------------------------------------------------------------------------------------------------------------------------------------------------------------------------------------------------------------------------------------------------------------------------------------------------------------------------------------------------------------------------------------------------------------------------------------------------------------------------------------------------------------------------|
| <b>MEDLINE &amp; PsychINFO (OVID)</b> exp = explode the search term to include narrower more specific terms, .af. = search all fields in the document                                                                                                                                                                                                                                                                                                                                                                                                                                                                                                                                               |
| <ol style="list-style-type: none"> <li>1. exp Hearing Loss/</li> <li>2. exp Hearing/</li> <li>3. exp Self Report/</li> <li>4. (self report* or self-report* or questionnaire).af.</li> <li>5. exp Cognition/</li> <li>6. cogniti* or executive or attention* or memory).af.</li> <li>7. (inhibit* or updat* or shift*) .af.</li> <li>8. 1 or 2</li> <li>9. 3 or 4</li> <li>10. 5 or 6 or 7</li> <li>11. 8 and 9 and 10</li> </ol>                                                                                                                                                                                                                                                                   |
| <b>EMBASE (OVID)</b>                                                                                                                                                                                                                                                                                                                                                                                                                                                                                                                                                                                                                                                                                |
| <ol style="list-style-type: none"> <li>1. exp Hearing Disorders/</li> <li>2. hearing.mp.</li> <li>3. exp Self-Report/</li> <li>4. exp Cognition/</li> <li>5. 1 or 2</li> <li>6. 3 and 4 and 5</li> </ol>                                                                                                                                                                                                                                                                                                                                                                                                                                                                                            |
| <b>PubMed &amp; Scopus</b>                                                                                                                                                                                                                                                                                                                                                                                                                                                                                                                                                                                                                                                                          |
| <ol style="list-style-type: none"> <li>1. hearing loss[MeSH Major Topic]</li> <li>2. hearing[MeSH Major Topic]</li> <li>3. self report[MeSH Major Topic]</li> <li>4. self report*[Title/Abstract]</li> <li>5. questionnaire[Title/Abstract]</li> <li>6. cognition[MeSH Major Topic]</li> <li>7. cogniti*[Title/Abstract]</li> <li>8. executive[Title/Abstract]</li> <li>9. attention*[Title/Abstract]</li> <li>10. memory[Title/Abstract]</li> <li>11. inhibi*[Title/Abstract]</li> <li>12. updat*[Title/Abstract]</li> <li>13. switch*[Title/Abstract]</li> <li>14. 1 or 2</li> <li>15. 3 or 4 or 5</li> <li>16. 6 or 7 or 8 or 9 or 10 or 11 or 12 or 13</li> <li>17. 14 and 15 and 16</li> </ol> |
| <b>ASSIA (via ProQuest)</b>                                                                                                                                                                                                                                                                                                                                                                                                                                                                                                                                                                                                                                                                         |
| <ol style="list-style-type: none"> <li>1. su(Hearing Loss)</li> <li>2. su(Hearing)</li> <li>3. su(self-Report)</li> <li>4. noft(self-report*)</li> <li>5. noft(questionnaire)</li> <li>6. su(cognition)</li> <li>7. noft(cogniti*)</li> <li>8. noft(executive)</li> <li>9. noft(attention*)</li> <li>10. noft(memory)</li> <li>11. noft(inhibit*)</li> </ol>                                                                                                                                                                                                                                                                                                                                        |

12. noft(update\*)
13. noft(shift\*)
14. 1 or 2
15. 3 or 4 or 5
16. 6 or 7 or 8 or 9 or 10 or 11 or 12 or 13
14. 14 and 15 and 16

**Web of Science**

1. (Hearing loss)
2. (Hearing)
3. (Self report)
4. KP=(Self report\*)
5. KP=(questionnaire)
6. KP=(cogniti\*)
7. KP=(attention\*)
8. KP=(memory)
9. TS=(cognition)
10. 1 or 2
11. 3 or 4 or 5
12. 6 or 7 or 8 or 9
13. 10 and 11 and 12

**CINAHL (via EBSCO)**

1. MH hearing loss
2. deafness
3. hearing impairment
4. deaf
5. hard of hearing
6. MH self-report measures
7. self-report questionnaire
8. MH cognition
9. cognitive function
10. TX cogniti\*
11. TX executive
12. TX attention\*
13. TX memory
14. 1 or 2 or 3 or 4 or 5
15. 6 or 7
16. 8 or 9 or 10 or 11 or 12 or 13
17. 14 and 15 and 16
